# Supplementary material for: Delirium as a predictor of mortality in US Medicare beneficiaries discharged from the emergency department: a national claims-level analysis up to 12 months
Source: PubMed Central journal article supplement — BMJ Open. 2018 May 5;8(5):e021258. doi: 10.1136/bmjopen-2017-021258 (PMC5942463; doi:10.1136/bmjopen-2017-021258), 2018-05-05
Supplement: bmjopen-2017-021258.draft_revisions.pdf [file bmjopen-2017-021258.draft_revisions.pdf]

# BMJ Open

BMJ Open is committed to open peer review. As part of this commitment we make the peer review history of every article we publish publicly available.

When an article is published we post the peer reviewers' comments and the authors' responses online. We also post the versions of the paper that were used during peer review. These are the versions that the peer review comments apply to.

The versions of the paper that follow are the versions that were submitted during the peer review process. They are not the versions of record or the final published versions. They should not be cited or distributed as the published version of this manuscript.

BMJ Open is an open access journal and the full, final, typeset and author-corrected version of record of the manuscript is available on our site with no access controls, subscription charges or pay-per-view fees (<http://bmjopen.bmj.com>).

If you have any questions on BMJ Open's open peer review process please email [info.bmjopen@bmj.com](mailto:info.bmjopen@bmj.com)

# BMJ Open

## **DELIRIUM AS A PREDICTOR OF MORTALITY IN MEDICARE BENEFICIARIES DISCHARGED FROM THE EMERGENCY DEPARTMENT: A NATIONAL CLAIMS LEVEL ANALYSES UP TO 12 MONTHS**

|                               |                                                                                                                                                                                    |
|-------------------------------|------------------------------------------------------------------------------------------------------------------------------------------------------------------------------------|
| Journal:                      | <i>BMJ Open</i>                                                                                                                                                                    |
| Manuscript ID                 | bmjopen-2017-021258                                                                                                                                                                |
| Article Type:                 | Research                                                                                                                                                                           |
| Date Submitted by the Author: | 19-Dec-2017                                                                                                                                                                        |
| Complete List of Authors:     | Israni, Juhi; West Health Institute, Clinical Lesser , Adriane ; West Health Institute, Clinical Kent , Tyler ; West Health Institute Ko , Kelly ; West Health Institute, Clinical |
| Keywords:                     | GERIATRIC MEDICINE, Delirium, Mortality, Claims Data                                                                                                                               |
|                               |                                                                                                                                                                                    |

SCHOLARONE™  
Manuscripts

**TITLE: DELIRIUM AS A PREDICTOR OF MORTALITY IN MEDICARE BENEFICIARIES DISCHARGED FROM THE EMERGENCY DEPARTMENT: A NATIONAL CLAIMS LEVEL ANALYSES UP TO 12 MONTHS**

| Name           | Credential | Email                                                              | Phone Number | Department | Organization                                                            |
|----------------|------------|--------------------------------------------------------------------|--------------|------------|-------------------------------------------------------------------------|
| Juhi Israni    | MS         | <a href="mailto:jisrani@westhealth.org">jisrani@westhealth.org</a> | 858-412-8694 | Clinical   | West Health Institute<br>10350 N Torrey Pines Rd,<br>La Jolla, CA 92037 |
| Adriane Lesser | MS         | <a href="mailto:aless@westhealth.org">aless@westhealth.org</a>     | 858-412-8778 | Clinical   | West Health Institute<br>10350 N Torrey Pines Rd,<br>La Jolla, CA 92037 |
| Tyler Kent     | BS         | <a href="mailto:tkent@westhealth.org">tkent@westhealth.org</a>     | 858-412-8683 | Clinical   | West Health Institute<br>10350 N Torrey Pines Rd,<br>La Jolla, CA 92037 |
| Kelly Ko       | PhD        | <a href="mailto:kko@westhealth.org">kko@westhealth.org</a>         | 858-412-8682 | Clinical   | West Health Institute<br>10350 N Torrey Pines Rd,<br>La Jolla, CA 92037 |

Abstract: 300

Word Count: 3,379

References: 17

Figures: 2

Tables: 2

**ABSTRACT**

**Background:** Delirium is common among seniors discharged from the Emergency Department (ED) and associated with increased risk of mortality. Prior research has addressed mortality associated with seniors discharged from the ED with delirium, however has generally relied on data from one or a small number of institutions and at single time points.

**Objectives:** Analyze mortality rates among seniors discharged from the ED with delirium up to 12 months at the national level.

**Design:** Retrospective Cohort Study

**Setting:** Analyzed data from the Center for Medicare & Medicaid Services (CMS) limited datasets for 2012 to 2013.

**Participants:** Medicare fee-for-service beneficiaries aged 65 years or older discharged from the ED. We focused on new incidence cases of delirium, patients with any prior claims for delirium, hospice claims, or End-Stage Renal Disease (ESRD) were excluded. Sample size included 26,245 delirium claims, and a randomly selected sample of 262,450 controls.

**Outcome Measures:** Mortality within 12 months after discharge from the ED, excluding patients transferred or admitted as inpatients.

**Results:** Among all beneficiaries, 46,508 (16.1%) died within 12 months. Of which 39,404 (15.0%) were in the non-delirium (i.e., control group) and 7,104 (27.1%) were in the delirium cohort respectively. Mortality was strongest at 30 days with an adjusted hazard ratio of 4.82 (95%, 4.60-5.04). Over time, delirium was consistently associated with increased mortality risk compared to controls up to 12-months (HR 2.07; 95%, 2.01-2.13). Covariates that affected mortality included older age, comorbidity, and presence of dementia.

**Conclusions:** Our results demonstrate delirium is a significant marker of mortality among seniors in the ED, and mortality risk is most salient in the first 3 months following an ED visit. Given the significant clinical and financial implications, there is a need to increase delirium screening and management within the ED to help identify and treat this potentially fatal condition.

**KEY WORDS:** *Geriatrics, Delirium, Mortality, Claims Data*

### Strengths & Limitations of this Study

- Many estimates for the burden of delirium in the ED come from cohort studies and surveys, which are often not population-based. There are very few estimates of incidence of geriatric delirium nationally, we leverage national claims data to analyze mortality rates nationally among seniors discharged from the ED with delirium at multiple time points up to 12 months.
- CMS data is one of the richest sources of utilization information nationally with sizable samples, documented procedures and diagnoses, verified deaths, beneficiary demographic information, and revenue center details
- Highlighting the burden of delirium in the Emergency Department (ED) can lend support to the implementation of screening and treatment recommendations, which in turn may reduce delirium-associated mortality.
- However, claims data lack information on severity and duration of illness prior to the diagnosed event.

Peer review only

## INTRODUCTION

The Emergency Department (ED) is often the point of entry for seniors into the healthcare system, and as such plays a unique role in setting the trajectory of care for this rapidly growing and often vulnerable segment of the population. Thus, timely screening of life-threatening conditions such as delirium is critical in the ED.

Delirium is broadly defined as an acute decline in attention and global cognitive functioning,<sup>1</sup> which is not only common, but often fatal in older adults.<sup>2</sup> In the United States alone, of the nearly 20 million older adults seen in the ED each year,<sup>3</sup> approximately 8-17% present to the ED suffering from delirium.<sup>4</sup> Prior research indicates that patients with delirium have a 12-month mortality rate between 10-26%,<sup>5</sup> which is comparable to patients with sepsis or acute myocardial infarction.<sup>6</sup> Additionally, the increased mortality risk for delirium patients in the ED has been identified at multiple time points, specifically at 3, 6, and 12 months.<sup>3 5 7</sup>

Furthermore, delirium is also costly and management can be resource intensive. For example, delirium is often associated with increased length of stay among hospitalized patients, may require use of restraints, sedative medications, or additional staffing (e.g. sitters) and generally linked to greater functional and cognitive decline.<sup>8</sup>

Despite the growing body of research demonstrating delirium is an independent predictor of mortality, as well as increased costs, management of delirium in the ED has not been well studied. In fact, some studies suggest delirium goes undiagnosed by up to 80% of ED physicians<sup>8 9</sup>, highlighting the magnitude of the missed opportunity to improve recognition and management of this potentially fatal condition.

While prior research has addressed the mortality risk associated with seniors discharged from the ED with delirium, much of this research has relied on data from a few, if not a single institution. Furthermore, previous research has typically examined mortality at only single points in time. Our work builds off this growing body of literature by leveraging national claims data to analyze mortality rates among seniors discharged from the ED with delirium at multiple time points up to 12 months, with implications for screening and treatment recommendations.

## METHODS

### Study Design & Data Source

Our study was a retrospective analysis of all available national claims-level data from 2012 to 2013. We analyzed data from the Center for Medicare & Medicaid Services (CMS) Research Data Assistance Center (ResDAC) dataset which includes data for approximately 98 percent of the U.S. population aged 65 years and older.<sup>10</sup> CMS data is one of the richest sources of utilization information nationally with sizable samples, documented procedures and diagnoses, verified deaths, beneficiary demographic information, and revenue center details. For our study, we utilized data for each institutional and non-institutional claim type with each record representing a beneficiary claim.

#### *Inclusion/exclusion criteria*

An ED-associated claim qualified as an index encounter if it was the beneficiary's initial ED outpatient-only claim during the study period and if the claim had subsequent claims-level data available for three months before and 12 months after index encounter (15 months of available data in total). The three-month control period prior to index ED encounter was used to exclude beneficiaries with any prior claims for delirium, hospice claims, or End-Stage Renal Disease (ESRD) to reduce the potential confounding nature of these factors and to focus largely on new incident cases of delirium. Index encounters that resulted in observation or an inpatient stay were also excluded due to likelihood of that these cases may represent higher acuity conditions. Once exclusion criteria were

1  
2  
3 applied, we removed a total of 3,808,806 claims (90,758 delirium, 223,292 Hospice, and 3,494,756 ESRD claims)  
4 leaving us with a total of 5,477,626 claims for our analyses. See Figure 1 for a flowchart showing application of the  
5 inclusion/exclusion criteria  
6

### 7 *Cohort Selection*

8  
9 Of the 5,477,626 claims, we focused our analyses on two cohorts: A delirium cohort, and a control group of  
10 beneficiaries without delirium. The groups were constructed as follows:  
11

12 *Delirium cohort:* Of the 5,477,626 eligible claims, delirium was identified based on presence of a qualifying  
13 outpatient diagnosis claim that included ICD-9 codes (293.0, 290.41, 293.89, 780.09, 292.81, 300.11, 290.11, 290.3,  
14 293.1, and categories 308, and 584 to 586) (see Appendix 1 for a more detailed description of codes). We limited  
15 delirium diagnoses to claims where at least one of these ICD-9 codes was documented at least once within any  
16 diagnosis, at which point the claim was flagged as a delirium encounter. We identified a total of 25,980  
17 beneficiaries with qualifying index encounters and a total of 26,245 delirium claims.  
18

19  
20 *Control cohort:* The control group consisted of beneficiaries with no delirium diagnosis present. Of the eligible  
21 5,477, 626 claims for our analyses, 5,451,381 qualifying index ED claims were eligible for the control group after  
22 selection of the delirium cohort from the eligible claims. Considering the size of our control group, we randomly  
23 selected from the 5,451,381 potential control beneficiaries using a 10:1 ratio following prior research on  
24 recommended statistical practice based on simulation studies of a minimum of 10 events per variable.<sup>11</sup> Following  
25 random selection, our control group included a total of 251,971 beneficiaries and a total of 262,450 claims.  
26

### 27 **Mortality**

28  
29 Mortality was flagged for all individuals who died within 12-months from index encounter and flagged only if the  
30 death date was verified at 30 days, 90 days, 6 months, and 12 months. Total number of deaths recorded for the  
31 delirium and control groups at 12 months were 7,104 (27.1) and 39,404 (15.0%) respectively. See Table 1 for  
32 mortality rate by death date.  
33

### 34 **Statistical Analysis**

35  
36 Our analyses focused on two primary areas: (1) the role of delirium as an independent predictor for mortality; and  
37 (2) identifying the effect of covariates (age, gender, dementia, & Charlson Comorbidity Index (CCI)) on mortality.  
38

39 We first compared the two cohorts using independent group t-test and  $\chi^2$  test for quantitative and categorical  
40 variables and found significant differences between the cohorts with respect to demographic and clinical  
41 measures. Members of the delirium cohort were more likely than controls to be older (mean age: 79 vs. 77), more  
42 likely to have a lower level of illness and severity burden (mean CCI: 4 vs. 6),<sup>12</sup> and more likely to have a primary  
43 diagnosis of mental/neurological clinical classification. The cohorts did not differ with respect to gender or  
44 ethnicity as both cohort's members were more likely to be Caucasian females (See Table 1).  
45

46  
47 Time 0 was defined as date of index encounter and days between death date and index encounter was calculated  
48 for the model. In addition, beneficiaries were censored at the end of the 12-month follow-up period if death did  
49 not occur or loss of follow-up, whichever occurred earlier. We then used the exponential model for the survival  
50 time distribution to estimate yearly mortality rates for the delirium and control cohort using an unadjusted Kaplan-  
51 Meier survival curve. In addition, a score test (univariate Cox proportional hazards model) was utilized as a  
52 comparison to the unadjusted Kaplan-Meier survival curves.<sup>13</sup>  
53  
54  
55  
56  
57  
58  
59  
60

Table 1: Cohort Characteristics

| Characteristics                                    | Delirium      | Control<br>(No Delirium) |
|----------------------------------------------------|---------------|--------------------------|
| <b>Total</b>                                       | 26,245 (100)  | 262,450 (100)            |
| <b>Age</b>                                         | ...           | ...                      |
| <b>65-74</b>                                       | 8,723 (33.2)  | 106,163 (40.4)           |
| <b>75-84</b>                                       | 9,500 (36.2)  | 96,998 (37.0)            |
| <b>≥85</b>                                         | 8,022 (30.6)  | 59,272 (22.6)            |
| <b>Mean Age</b>                                    | 79            | 77                       |
| <b>Gender</b>                                      | ...           | ...                      |
| <b>Female</b>                                      | 16,279 (62.1) | 160,421 (61.1)           |
| <b>Male</b>                                        | 9,966 (37.9)  | 102,012 (38.8)           |
| <b>Race</b>                                        | ...           | ...                      |
| <b>Caucasian</b>                                   | 22,699 (86.5) | 222,177 (84.7)           |
| <b>African American</b>                            | 2,243 (8.5)   | 27,328 (10.4)            |
| <b>Asian</b>                                       | 345 (1.3)     | 3,115 (1.2)              |
| <b>Hispanic</b>                                    | 473 (1.8)     | 4,683 (1.8)              |
| <b>Native American</b>                             | 134 (0.51)    | 1,389 (0.53)             |
| <b>Other/Unknown</b>                               | 281 (1.1)     | 2,852 (1.1)              |
| <b>Charlson Comorbidity Scores</b>                 | ...           | ...                      |
| <b>None (0)</b>                                    | 12,423 (47.3) | 113,743 (43.3)           |
| <b>Low (1-4)</b>                                   | 13,182 (50.2) | 141,832 (54.0)           |
| <b>Moderate (5-9)</b>                              | 595 (2.3)     | 6,553 (2.5)              |
| <b>High (10+)</b>                                  | 45 (0.17)     | 305 (0.12)               |
| <b>Mean CCI Score</b>                              | 4             | 6                        |
| <b>Primary Diagnosis<br/>(ICD-9 Codes)</b>         | ...           | ...                      |
| <b>Infectious Diseases (0-139)</b>                 | 252 (1.0)     | 2,235 (0.9)              |
| <b>Neoplasms (140-239)</b>                         | 93 (0.4)      | 926 (0.4)                |
| <b>Mental/Neurological<br/>(240-289)</b>           | 4,651 (17.7)  | 8,547 (3.3)              |
| <b>Cardiovascular (390-429)</b>                    | 1,396 (5.3)   | 17,038 (6.5)             |
| <b>Cerebrovascular (430-459)</b>                   | 1,117 (4.3)   | 7,814 (3.0)              |
| <b>Respiratory (460-519)</b>                       | 794 (3.0)     | 15,802 (6.0)             |
| <b>Digestive (460-519)</b>                         | 312 (1.2)     | 13,927 (5.3)             |
| <b>Urogenital (580-629)</b>                        | 1,552 (5.9)   | 14,509 (5.5)             |
| <b>Musculoskeletal (710-739)</b>                   | 412 (1.6)     | 19,779 (7.5)             |
| <b>Symptoms (782-789)</b>                          | 1,803 (6.9)   | 60,126 (22.9)            |
| <b>Injuries (790-799)</b>                          | 151 (0.6)     | 1,593 (0.6)              |
| <b>Ill-defined, Skin, or Missing<br/>(680-709)</b> | 58 (0.2)      | 5,299 (2.0)              |
| <b>Endocrine (240-289)</b>                         | 1,463 (5.6)   | 10,788 (4.1)             |
| <b>Mortality</b>                                   |               |                          |
| <b>30 Days</b>                                     | 3,129 (11.9)  | 7,649 (2.9)              |
| <b>90 Days</b>                                     | 4,251 (16.2)  | 15,267 (5.8)             |
| <b>6 Months</b>                                    | 5,364 (20.4)  | 24,453 (9.3)             |
| <b>12 Months</b>                                   | 7,104 (27.1)  | 39,404 (15.0)            |



1  
2  
3 Additionally, to adjust for possible prognostic factors of delirium on mortality, we used a multivariable Cox  
4 proportional hazards model with the following covariates: age, gender, dementia, and comorbidity (as defined by  
5 CCI). To address the potential interaction of delirium on mortality based on these characteristics, we evaluated all  
6 covariates in the multivariable Cox model, and then selected statistically significant interactions for further testing.  
7 In addition, to confirm results we re-ran these analyses using multiple randomly selected samples from within the  
8 control group and found no statistically significant differences.  
9

## 10 11 **RESULTS**

12  
13 During the 12-month study period 288,695 claims were included in our analysis sample, of which 26,245 comprised  
14 the delirium cohort and 262,450 control claims. Beneficiaries were largely similar with respect to gender, and  
15 primary diagnosis distributions, however when evaluating comorbidity scores, beneficiaries had higher scores in  
16 the control group suggesting higher risk of mortality (see Table 1). Among all beneficiaries, 46,508 (16.1%) died  
17 within 12 months. Of which 39,404 (15.0%) were in the non-delirium (i.e., control group) and 7,104 (27.1%) were  
18 in the delirium cohort respectively. In the delirium cohort, Kaplan-Meier survival decreased rapidly during the first  
19 30 days after the index visit and thereafter continued to decline at a slower pace in comparison to the control  
20 group. At 30 days after index visit, the survival rate for beneficiaries with delirium was 88.2%, while the control  
21 group had a survival rate of 97.6%.  
22  
23

24  
25 Results from the univariate and multivariate Cox proportional hazard models for 30 days, 90 days, 6 months, and  
26 12 months are reported in Table 2. Our unadjusted results for delirium and mortality was strongest at 30 days as  
27 illustrated in the Kaplan-Meier survival curve (HR, 4.35; 95% CI, 4.17-4.54) (see Figure 2). Even after adjusting for  
28 covariates, delirium was still independently associated with approximately a five-fold increase in mortality during  
29 the 30-day follow-up period (HR 4.82; 95% CI, 4.60-5.04). Over time from index ED encounter, delirium was still c  
30 associated with an increased risk of mortality compared to the control group. However, mortality risk (while still  
31 significant) did decrease over time up until 12 months (HR 2.07; 95%, 2.01-2.13).  
32  
33  
34  
35  
36  
37  
38  
39  
40  
41  
42  
43  
44  
45  
46  
47  
48  
49  
50  
51  
52  
53  
54  
55  
56  
57  
58  
59  
60

Table 2: Cox Proportional Hazard Ratios in Intervals to 12-Month Mortality

| Mortality Rate   | Variable          | Univariate         | Multivariate       |
|------------------|-------------------|--------------------|--------------------|
| <b>30 Days</b>   | Delirium/Control  | 4.35† (4.17-4.54)  | 4.82 † (4.60-5.04) |
| ...              | Age               | 1.06† (1.05-1.06)  | 1.06 † (1.05-1.06) |
| ...              | Male/Female       | 0.72 † (0.69-0.74) | 0.70 † (0.67-0.73) |
| ...              | CCI               | 1.29† (0.77-1.28)  | 1.30 † (1.29-1.31) |
| ...              | Dementia          | 1.84† (1.75-1.94)  | 1.44 † (1.35-1.53) |
| ...              | Delirium*Dementia | ...                | 0.41 † (0.36-0.45) |
| <b>90 Days</b>   |                   |                    |                    |
| ...              | Delirium/Control  | 3.02 † (2.14-2.30) | 3.27 † (3.15-3.40) |
| ...              | Age               | 1.06 † (1.05-1.06) | 1.06 † (1.05-1.06) |
| ...              | Male/Female       | 0.74 † (0.72-0.76) | 0.72 † (0.70-0.75) |
| ...              | CCI               | 1.32 † (1.31-1.32) | 1.32 † (1.31-1.33) |
| ...              | Dementia          | 2.12 † (2.04-2.20) | 1.58 † (1.51-1.65) |
| ...              | Delirium*Dementia | ...                | 0.48 † (0.44-0.52) |
| <b>6 months</b>  |                   |                    |                    |
| ...              | Delirium/Control  | 2.42 † (2.35-2.49) | 2.55 † (2.47-2.64) |
| ...              | Age               | 1.06 † (1.05-1.06) | 1.06 † (1.05-1.06) |
| ...              | Male/Female       | 0.76 † (0.74-0.78) | 0.73 † (0.71-0.75) |
| ...              | CCI               | 1.31 † (1.30-1.31) | 1.31 † (1.31-1.32) |
| ...              | Dementia          | 2.25 † (2.18-2.31) | 1.64 † (1.58-1.70) |
| ...              | Delirium*Dementia | ...                | 0.53 † (0.49-0.57) |
| <b>12 months</b> |                   |                    |                    |
| ...              | Delirium/Control  | 2.02 † (1.96-2.07) | 2.07 † (2.01-2.13) |
| ...              | Age               | 1.06 (1.05-1.06)   | 1.06 † (1.05-1.06) |
| ...              | Male/Female       | 0.76 † (0.75-0.78) | 0.73 † (0.71-0.74) |
| ...              | CCI               | 1.30 † (1.29-1.31) | 1.30 † (1.29-1.31) |
| ...              | Dementia          | 2.28 ‡ (2.23-2.34) | 1.62 † (1.57-1.66) |
| ...              | Delirium*Dementia | ...                | 0.60 † (0.56-0.64) |

Data are hazard ratios for univariate & multivariate for time periods to 1-year mortality rate (95% confidence interval). Of 277,951 patients, 46,508 died (16.7%) in both groups. Of which 39,404 (15.0%) were in the control group (no delirium) & 7,104 (27.1%) were in the delirium cohort, respectively.  
Note(s): †P-value < 0.001; \* indicates interaction

Other covariates that affected mortality rate included older age and higher comorbidity scores. However, women with delirium had a decreased risk of mortality, compared to males with delirium (HR 0.73; 95% CI, 0.71-0.74) at 12 months (see Table 2).

The presence of dementia, on the other hand, had a stronger association in the univariate model, however our adjusted multivariate model indicated dementia was not a significant predictor of mortality and instead associated with a significant protective effect on mortality. This protective effect is demonstrated by the significant statistical interaction between delirium and dementia ( $P \geq 0.001$ ) while adjusting for covariates (HR 0.60; 95% CI, 0.56-0.64).

## DISCUSSION

Our study found that delirium is an independent predictor of mortality among ED patients diagnosed with delirium in the ED compared to ED patients without delirium, even after adjusting for confounding factors such as age, gender, comorbidity, and dementia. While delirium had a strong effect on mortality during the entire 12-month follow-up period, the strongest association was at 30 days following index ED visit.

1  
2  
3 Generally, our findings are consistent with prior research examining delirium and mortality risk. For example, Lewis  
4 et al. observed that patients with delirium discharged from the ED had a significantly higher mortality risk at 3  
5 months compared to a comparable control group (14% versus 8%), and we found similar unadjusted results at 3  
6 months (16% versus 6%). Similarly, our findings report a two-fold mortality risk for delirium patients at 12 months  
7 following an ED visit (HR 2.07; 95%, 2.01-2.13) in line with McCusker et al (HR 2.11; 95%, 1.18-3.77), after adjusting  
8 for covariates. However, our results indicate a higher risk of mortality compared to prior research at 6 months, as  
9 Han et al. found seniors to be 1.7 times more likely to be at risk for mortality (HR 1.72; 95% CI, 1.04-2.86),  
10 compared to our study which found the risk to be over 2.5 times more likely at 6 months (HR 2.55, 95% CI, 2.47-  
11 2.64). In addition, our findings are also consistent with prior research on delirium as an independent indicator for  
12 mortality in the inpatient setting.<sup>3</sup> For instance, past studies report a two-fold increase in mortality risk among  
13 delirium patients, and our results point to a similar two-fold increase in mortality during 12-month follow-up.

14  
15  
16 Our findings are also in line with prior research highlighting the role of dementia superimposed on delirium and its  
17 protective effect on mortality.<sup>3</sup> Others have theorized as to why this is the case, however further research is  
18 needed in distinguishing acute behavioral changes of delirium with the longer-term changes associated with  
19 dementia to properly evaluate its impact. One reason may be that delirium may be harder to distinguish in  
20 patients with dementia, leading to misclassification in claims data. Further research is needed in distinguishing  
21 acute behavioral changes of delirium with the longer-term changes associated with dementia and the proper  
22 screening and measurements.

23  
24  
25 Given the clinical as well as cost implications, our results call for an increase in screening and management of  
26 delirium in the ED. A practical first step is through implementation of a validated delirium screening tool into the  
27 ED clinical workflow. Since the majority of patients with delirium have a clinically subtle presentation, it is often  
28 missed by providers, which is likely to be the case in a busy ED. While multiple resources exist for delirium  
29 screening, the most widely used in the inpatient setting is the Confusion Assessment Method (CAM). The brief  
30 CAM (b-CAM) is a modified and validated screening tool for delirium and is one of, if not the only instrument  
31 validated for use in the ED setting.<sup>14 15</sup> The b-CAM takes less than 2 minutes to perform, is highly reliable, easy to  
32 use, and requires minimal training, all of which make it an ideal instrument for an ED.<sup>16</sup> While other validated  
33 screening instruments are available such as the Delirium Rating Scale, the Nurses Delirium Screening Checklist, or  
34 the 4As test, many of these tools were not designed for use in the ED and either require specialized training or  
35 more time to complete than is often available in an ED encounter.<sup>17</sup>

36  
37  
38 A growing number of EDs specializing in geriatric care (i.e., Geriatric Emergency Departments) are already  
39 incorporating delirium protocols and screening instruments into their ED workflow. In fact, the Geriatric  
40 Emergency Department Guidelines, endorsed by leading professional societies in Emergency Medicine, Nursing  
41 and Geriatrics, identify delirium screening, and specifically the b-CAM as a recommended screening instrument for  
42 use in the ED's. The Society for Academic Emergency Medicine has even recommended delirium screening as a  
43 key quality indicator for geriatric emergency care underscoring the importance of detection and management of  
44 delirium in the ED.<sup>2 14</sup>

45  
46  
47 While screening for delirium is an important first step, screening alone is insufficient and must be followed by  
48 clinical intervention to be effective. Based on screening results, decreased use of psychoactive medication or other  
49 non-pharmacologic approaches such as increased mobilization (i.e., reduced of physical restraints, bladder  
50 catheters), and re-orienting the patient through cognitive stimulation are examples of interventions used in the  
51 inpatient setting that may also be appropriate for the ED.<sup>7</sup> While it remains unclear whether instruments such as  
52 the b-CAM or follow-up interventions used in the inpatient setting are associated with reduced mortality risk in the  
53 ED, incorporating a delirium instrument into ED workflows represents an important first step to more reliably  
54

1  
2  
3 detect delirium in the ED. Future research will then need to address the most effective screening and treatment  
4 protocols.  
5

### 6 **Limitations**

7  
8 Our study utilized national claims-level data, which poses several limitations. The date of claims submission does  
9 not necessarily reflect date of service however these differences are often considered marginal. Additionally,  
10 claims data lack information on severity and duration of illness prior to the diagnosed event. While we attempted  
11 to address this issue by including a three-month control period prior to qualifying index encounters and focusing  
12 on outpatient claims only, this still did not address the severity of delirium, which is likely to impact mortality risk.

13  
14 Furthermore, we identified 26,245 (0.35%) patients  $\geq 65$  with delirium which is lower compared to rates of  
15 delirium in the ED widely reported in literature, which ranges anywhere from 3.6-35% with a mean of 17.5%.<sup>459</sup>  
16 Our lower incidence of delirium based on available claims may reflect a failure to diagnose, failure to code, or a  
17 lower rate of delirium patients in ED's. This potential absence of delirium diagnoses from a national claims  
18 database may limit the generalizability of our findings in helping capture the true impact of delirium on mortality.  
19  
20  
21

### 22 **CONCLUSIONS**

23  
24 Our study of national claims-level data demonstrates that delirium is a significant marker of mortality among  
25 seniors visiting the ED, and that mortality risk is most prominent in the first three months following an ED visit.  
26 Given the significant clinical as well as financial implications associated with seniors discharged from the ED with  
27 delirium, there is a need to increase delirium screening and management within the ED to help identify and treat  
28 underlying conditions. Specifically, future research is needed to focus on implementation and dissemination of  
29 existing delirium protocols (i.e., screening and follow-up interventions) for the ED and whether doing so helps  
30 reduce mortality risk in seniors discharged from the ED with this fatal and potentially avoidable condition.  
31  
32

### 33 **FOOTNOTES**

#### 34 **Figure Legends**

35  
36  
37  
38  
39 **Figure 1. Flowchart for inclusion/exclusion criteria**

40  
41 **Figure 2. Kaplan-Meier Survival Curves**

42 Assessing changes over time in the unadjusted effect of delirium on mortality in comparison to the control group (no delirium).  
43 The dotted line represents patients with delirium and when compared to the control group the survival rate decreased rapidly  
44 during the first 30 days after the index visit and continued to decline slowly.  
45  
46  
47  
48  
49  
50  
51  
52  
53  
54  
55  
56  
57  
58  
59  
60

1  
2  
3  
4  
5 **Contributors Statement:** JI, TK, AL, and KK contributed to study design. JI and TK performed the data analysis. JI  
6 led drafting of the manuscript, with additional manuscript writing performed by AL and KK All authors had full  
7 access to all the data including statistical reports and tables in the study and can take full responsibility for the  
8 integrity of the data and the accuracy of the data analysis.  
9

10 **Funding:** This project received no specific funding.  
11

12 **Competing Interests:** All authors declare no financial relationships with any organizations that might have an  
13 interest in the submitted work or other relationships or activities that could appear to have influenced the  
14 submitted work.  
15

16 **Data Sharing Statement:** No additional data available  
17

18 **Transparency:** The lead author affirms that the manuscript is an honest, accurate and transparent account of the  
19 study analyzed and reported; that no important aspects of the study have been omitted; and that any  
20 discrepancies from the study as planned have been explained.  
21  
22

23 **Copyright Statement:** The Corresponding Author has the right to grant on behalf of all authors and does grant  
24 on behalf of all authors, a worldwide license to the Publishers and its licensees in perpetuity, in all forms, formats  
25 and media (whether known now or created in the future), to i) publish, reproduce, distribute, display and store the  
26 Contribution, ii) translate the Contribution into other languages, create adaptations, reprints, include within  
27 collections and create summaries, extracts and/or, abstracts of the Contribution, iii) create any other derivative  
28 work(s) based on the Contribution, iv) to exploit all subsidiary rights in the Contribution, v) the inclusion of  
29 electronic links from the Contribution to third party material where-ever it may be located; and, vi) license any  
30 third party to do any or all of the above.  
31  
32  
33  
34  
35  
36  
37  
38  
39  
40  
41  
42  
43  
44  
45  
46  
47  
48  
49  
50  
51  
52  
53  
54  
55  
56  
57  
58  
59  
60

## REFERENCES

1. Albert M, Linda Ashman, Jill Emergency Department Visits by Persons Aged 65 and Over: United States. NCHS Data Brief 2013 (130).
2. Fong T, Tulebaev SI, Sharon Delirium in Elderly Adults: Diagnosis, Prevention, and Treatment *Nature Reviews Neurology* 2009;**5**:210-20.
3. Kakuma R, Galbaud Du Fort G, Arsenault Lea. Delirium in Older Emergency Department Patients Discharged Home: Effect on Survival *Journal of American Geriatrics Society* 2003;**51**(4):443-50.
4. Inouye SW, Rudi Sacynski, Jane Delirium in Elderly People *Lancet* 2015 **383**(9920):911-22.
5. McCusker JM, Cole Abrahamowicz, Michal Delirium Predicts 12 Month Mortality *JAMA Internal Medicine* 2002 **4**(162):457-63.
6. Gower LG, Medley Kang, Christopher Emergency Department Management of Delirium in the Elderly *Western Journal of Emergency Medicine* 2012 **2**(13):194-201.
7. Han JW, Amanda Ely, Wesley Delirium in the Older Emergency Department Patient - A Quiet Epidemic *Emergency Medicine Clinics of North America* 2010 **3**(28):611-31.
8. Han J, Zimmerman EC, Nathan, et al. . Delirium in Older Emergency Department Patients: Recognition, Risk Factors, and Psychomotor Subtypes *Journal of the Society for Academic Emergency Medicine* 2009 **16**:193-200.
9. Han J, Shintani AE, Svetlana, et al. . Delirium in the Emergency Department: an Independent Predictor of Death Within Six Months. *Annals of Emergency Medicine* 2010 **3**(56):244-52.
10. Tyree PL, Bonnie Lafferty, William Challenges and Advantages of Using Medicare Claims Data for Utilization Analysis *The American Journal of Medicine* 2006 **4**(21):269-75.
11. Ogundimu EA, Douglas Collins, Gary Adequate Sample Size for Developing Prediction Models is Not Simply Related to Events per Variable *Journal of Clinical Epidemiology* 2016 175-82.
12. Charlson MP, Kathy Ales, Kathy, et al. . A New Method of Classifying Prognostic Comorbidity in Longitudinal Studies: Development & Validation *Journal Of Chronic Diseases* 1987;**40**(5):373-83.
13. Smith BS, Tyler Kaplan Meier & Cox Proportional Hazards Modeling: Hands-On Survival Analysis Department of Defense Center for Deployment Health Research 2014.
14. De JW, Anne. Delirium Screening: A Systematic Review of Delirium Screening Tools *The Gerontologist* 2015 **55**(6):1079-99.
15. Wei LF, Michael, Sternberg Eea. The Confusion Assessment Method (CAM): A Systematic Review of Current Usage *Journal of American Geriatrics Society* 2008 **56**(5):823-30.
16. Mariz J, Castanho TT, Jorge et al. . Delirium Diagnostic and Screening Instruments in the Emergency Department: An Up-to-Date Systematic Review *Journal of American Geriatrics Society* 2016
17. Grover SK, Natasha Assesment Scales of Delirium *World Journal of Psychiatry* 2012 **2**(4):58-70.

1  
2  
3  
4  
5  
6  
7  
8  
9  
10  
11  
12  
13  
14  
15  
16  
17  
18  
19  
20  
21  
22  
23  
24  
25  
26  
27  
28  
29  
30  
31  
32  
33  
34  
35  
36  
37  
38  
39  
40  
41  
42  
43  
44  
45  
46  
47  
48  
49  
50  
51  
52  
53  
54  
55  
56  
57  
58  
59  
60

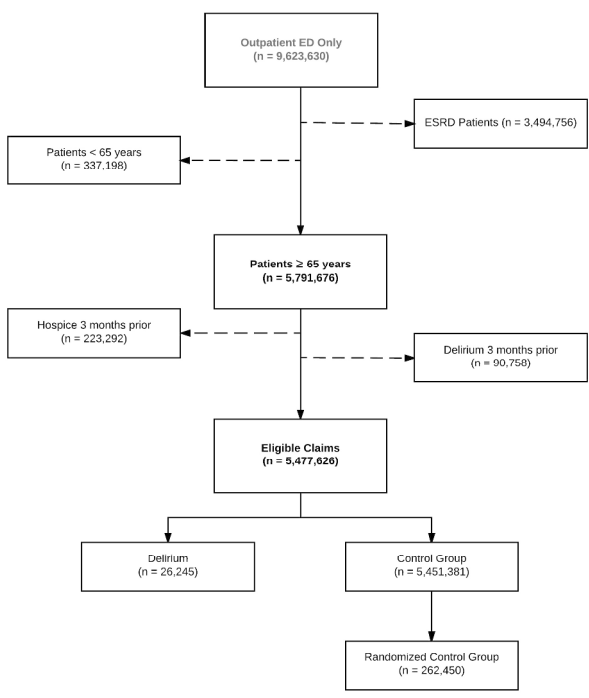

Figure 1. Flowchart for inclusion/exclusion criteria

280x217mm (300 x 300 DPI)

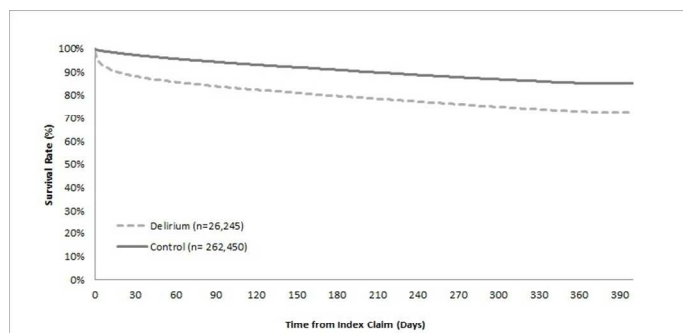

Figure 2. Kaplan-Meier Survival Curves

Assessing changes over time in the unadjusted effect of delirium on mortality in comparison to the control group (no delirium). The dotted line represents patients with delirium and when compared to the control group the survival rate decreased rapidly during the first 30 days after the index visit and continued to decline slowly.

304x190mm (96 x 96 DPI)



## Supplemental File

### Appendix 1. Diagnosis Related Group (DRG) codes for Delirium with ICD-9

| ICD-9 Code     | Description                                                 |
|----------------|-------------------------------------------------------------|
| 293.0          | Acute Delirium (also documented as acute confusional state) |
| 290.41 & 437.0 | Arteriosclerotic Dementia with Delirium                     |
| 293.89         | Chronic Delirium                                            |
| 780.09         | Delirium, not otherwise specified                           |
| 293.81         | Drug Induced Delirium                                       |
| 300.11         | Hysterical Delirium                                         |
| 290.11         | Presenile Dementia with Delirium                            |
| 290.3          | Senile Dementia with Delirium                               |
| 293.1          | Subacute Delirium                                           |
| 308            | Exhaustion Delirium                                         |
| 584-586        | Uremic Delirium                                             |

# BMJ Open

## DELIRIUM AS A PREDICTOR OF MORTALITY IN US MEDICARE BENEFICIARIES DISCHARGED FROM THE EMERGENCY DEPARTMENT: A NATIONAL CLAIMS LEVEL ANALYSES UP TO 12 MONTHS

|                                 |                                                                                                                                                                                    |
|---------------------------------|------------------------------------------------------------------------------------------------------------------------------------------------------------------------------------|
| Journal:                        | <i>BMJ Open</i>                                                                                                                                                                    |
| Manuscript ID                   | bmjopen-2017-021258.R1                                                                                                                                                             |
| Article Type:                   | Research                                                                                                                                                                           |
| Date Submitted by the Author:   | 08-Mar-2018                                                                                                                                                                        |
| Complete List of Authors:       | Israni, Juhi; West Health Institute, Clinical Lesser , Adriane ; West Health Institute, Clinical Kent , Tyler ; West Health Institute Ko , Kelly ; West Health Institute, Clinical |
| <b>Primary Subject Heading</b>: | Geriatric medicine                                                                                                                                                                 |
| Secondary Subject Heading:      | Emergency medicine                                                                                                                                                                 |
| Keywords:                       | GERIATRIC MEDICINE, Delirium, Mortality, Claims Data                                                                                                                               |
|                                 |                                                                                                                                                                                    |

SCHOLARONE™  
Manuscripts

Peer Review Only

**TITLE: DELIRIUM AS A PREDICTOR OF MORTALITY IN US MEDICARE BENEFICIARIES DISCHARGED FROM THE EMERGENCY DEPARTMENT: A NATIONAL CLAIMS LEVEL ANALYSES UP TO 12 MONTHS**

| Name           | Credential | Email                                                              | Phone Number | Department | Organization                                                            |
|----------------|------------|--------------------------------------------------------------------|--------------|------------|-------------------------------------------------------------------------|
| Juhi Israni    | MS         | <a href="mailto:jisrani@westhealth.org">jisrani@westhealth.org</a> | 858-412-8694 | Clinical   | West Health Institute<br>10350 N Torrey Pines Rd,<br>La Jolla, CA 92037 |
| Adriane Lesser | MS         | <a href="mailto:aless@westhealth.org">aless@westhealth.org</a>     | 858-412-8778 | Clinical   | West Health Institute<br>10350 N Torrey Pines Rd,<br>La Jolla, CA 92037 |
| Tyler Kent     | BS         | <a href="mailto:tkent@westhealth.org">tkent@westhealth.org</a>     | 858-412-8683 | Clinical   | West Health Institute<br>10350 N Torrey Pines Rd,<br>La Jolla, CA 92037 |
| Kelly Ko       | PhD        | <a href="mailto:kko@westhealth.org">kko@westhealth.org</a>         | 858-412-8682 | Clinical   | West Health Institute<br>10350 N Torrey Pines Rd,<br>La Jolla, CA 92037 |

Abstract: 300

Word Count: 3,618

References: 17

Figures: 2

Tables: 2

**ABSTRACT**

**Background:** Delirium is common among seniors discharged from the Emergency Department (ED) and associated with increased risk of mortality. Prior research has addressed mortality associated with seniors discharged from the ED with delirium, however has generally relied on data from one or a small number of institutions and at single time points.

**Objectives:** Analyze mortality rates among seniors discharged from the ED with delirium up to 12 months at the national level.

**Design:** Retrospective Cohort Study

**Setting:** Analyzed data from the Center for Medicare & Medicaid Services (CMS) limited datasets for 2012 to 2013.

**Participants:** Medicare fee-for-service beneficiaries aged 65 years or older discharged from the ED. We focused on new incidence cases of delirium, patients with any prior claims for delirium, hospice claims, or End-Stage Renal Disease (ESRD) were excluded. Sample size included 26,245 delirium claims, and a randomly selected sample of 262,450 controls.

**Outcome Measures:** Mortality within 12 months after discharge from the ED, excluding patients transferred or admitted as inpatients.

**Results:** Among all beneficiaries, 46,508 (16.1%) died within 12 months. Of which 39,404 (15.0%) were in the non-delirium (i.e., control group) and 7,104 (27.1%) were in the delirium cohort respectively. Mortality was strongest at 30 days with an adjusted hazard ratio of 4.82 (95%, 4.60-5.04). Over time, delirium was consistently associated with increased mortality risk compared to controls up to 12-months (HR 2.07; 95%, 2.01-2.13). Covariates that affected mortality included older age, comorbidity, and presence of dementia.

**Conclusions:** Our results demonstrate delirium is a significant marker of mortality among seniors in the ED, and mortality risk is most salient in the first 3 months following an ED visit. Given the significant clinical and financial implications, there is a need to increase delirium screening and management within the ED to help identify and treat this potentially fatal condition.

**KEY WORDS:** *Geriatrics, Delirium, Mortality, Claims Data*

1  
2  
3 **Strengths & Limitations of this Study**  
4  
5

- 6 • This study included the entire Medicare population aged 65 and older with outpatient claims in the  
7 United States, over 5.8 million patients.
- 8 • A limitation of this study is that we could not control for delirium severity or duration of illness prior  
9 to the diagnosed event as this information was not available in the claims-level data used in our  
10 analysis.  
11  
12  
13  
14  
15  
16  
17  
18

19  
20  
21  
22  
23  
24  
25  
26  
27  
28  
29  
30  
31  
32  
33  
34  
35  
36  
37  
38  
39  
40  
41  
42  
43  
44  
45  
46  
47  
48  
49  
50  
51  
52  
53  
54  
55  
56  
57  
58  
59  
60

For peer review only

## INTRODUCTION

The Emergency Department (ED) is often the point of entry for seniors into the healthcare system, and as such plays a unique role in setting the trajectory of care for this rapidly growing and often vulnerable segment of the population. Thus, timely screening of life-threatening conditions such as delirium is critical in the ED.

Delirium is broadly defined as an acute decline in attention and global cognitive functioning,<sup>1</sup> which is not only common, but often fatal in older adults.<sup>2</sup> In the United States alone, of the nearly 20 million older adults seen in the ED each year,<sup>3</sup> approximately 8-17% present to the ED suffering from delirium.<sup>4</sup> Prior research indicates that patients with delirium have a 12-month mortality rate between 10-26%,<sup>5</sup> which is comparable to patients with sepsis or acute myocardial infarction.<sup>6</sup> Additionally, the increased mortality risk for delirium patients in the ED has been identified at multiple time points, specifically at 3, 6, and 12 months.<sup>3 5 7</sup>

Furthermore, delirium is also costly and management can be resource intensive. For example, delirium is often associated with increased length of stay among hospitalized patients, may require use of restraints, sedative medications, or additional staffing (e.g. sitters) and generally linked to greater functional and cognitive decline.<sup>8</sup>

Despite the growing body of research demonstrating delirium is an independent predictor of mortality, as well as increased costs, management of delirium in the ED has not been well studied. In fact, some studies suggest delirium goes undiagnosed by up to 80% of ED physicians<sup>8 9</sup>, highlighting the magnitude of the missed opportunity to improve recognition and management of this potentially fatal condition.

While prior research has addressed the mortality risk associated with seniors discharged from the ED with delirium, much of this research has relied on data from a few, if not a single institution. Furthermore, previous research has typically examined mortality at only single points in time. Our work builds off this growing body of literature by leveraging national claims data to analyze mortality rates among seniors discharged from the ED with delirium at multiple time points up to 12 months, with implications for screening and treatment recommendations.

## METHODS

### Patient & Public Involvement

Patients or the public were not directly involved as the analysis was conducted utilizing US claims-level data.

### Study Design & Data Source

Our study was a retrospective analysis of all available national claims-level data from 2012 to 2013. We analyzed data from the Center for Medicare & Medicaid Services (CMS) Research Data Assistance Center (ResDAC) dataset which includes data for approximately 98 percent of the U.S. population aged 65 years and older.<sup>10</sup> CMS data is one of the richest sources of utilization information nationally with sizable samples, documented procedures and diagnoses, verified deaths, beneficiary demographic information, and revenue center details. For our study, we utilized data for each institutional and non-institutional claim type with each record representing a beneficiary claim.

### *Inclusion/exclusion criteria*

An ED-associated claim qualified as an index encounter if it was the beneficiary's initial ED outpatient-only claim during the study period and if the claim had subsequent claims-level data available for three months before and 12 months after index encounter (15 months of available data in total). The three-month control period prior to index ED encounter was used to exclude beneficiaries with any prior claims for delirium, hospice claims, or End-Stage

1  
2  
3 Renal Disease (ESRD) to reduce the potential confounding nature of these factors and to focus largely on new  
4 incident cases of delirium. We excluded ESRD patients from our sample population as prior literature suggests  
5 claims data for ESRD is often incompletely documented or not tracked in the Medicare data system with as much  
6 rigor as the general Medicare population.<sup>11</sup> Index encounters that resulted in observation or an inpatient stay were  
7 also excluded due to likelihood of that these cases may represent higher acuity conditions. Once exclusion criteria  
8 were applied, we removed a total of 3,808,806 claims (90,758 delirium, 223,292 Hospice, and 3,494,756 ESRD  
9 claims) leaving us with a total of 5,477,626 claims for our analyses. See Figure 1 for a flowchart showing application  
10 of the inclusion/exclusion criteria.  
11  
12

### 13 *Cohort Selection*

14  
15 Of the 5,477,626 claims, we focused our analyses on two cohorts: A delirium cohort, and a control group of  
16 beneficiaries without delirium. The groups were constructed as follows:  
17

18 *Delirium cohort:* Of the 5,477,626 eligible claims, delirium was identified based on presence of a qualifying  
19 outpatient diagnosis claim that included ICD-9 codes (293.0, 290.41, 293.89, 780.09, 292.81, 300.11, 290.11, 290.3,  
20 293.1, and categories 308, and 584 to 586) (see Appendix 1 for a more detailed description of codes). We limited  
21 delirium diagnoses to claims where at least one of these ICD-9 codes was documented at least once within any  
22 diagnosis, at which point the claim was flagged as a delirium encounter. We identified a total of 25,980  
23 beneficiaries with qualifying index encounters and a total of 26,245 delirium claims.  
24  
25

26 *Control cohort:* The control group consisted of beneficiaries with no delirium diagnosis present. Of the eligible  
27 5,477, 626 claims for our analyses, 5,451,381 qualifying index ED claims were eligible for the control group after  
28 selection of the delirium cohort from the eligible claims. Considering the size of our control group, we randomly  
29 selected from the 5,451,381 potential control beneficiaries using a 10:1 ratio following prior research on  
30 recommended statistical practice based on simulation studies of a minimum of 10 events per variable.<sup>12</sup> Following  
31 random selection, our control group included a total of 251,971 beneficiaries and a total of 262,450 claims.  
32  
33

### 34 **Mortality**

35 Mortality was flagged for all individuals who died within 12-months from index encounter and flagged only if the  
36 death date was verified at 30 days, 90 days, 6 months, and 12 months. Total number of deaths recorded for the  
37 delirium and control groups at 12 months were 7,104 (27.1) and 39,404 (15.0%) respectively. See Table 1 for  
38 mortality rate by death date.  
39  
40

### 41 **Statistical Analysis**

42 Our analyses focused on two primary areas: (1) the role of delirium as an independent predictor for mortality; and  
43 (2) identifying the effect of covariates (age, gender, dementia, & Charlson Comorbidity Index (CCI)) on mortality.  
44

45 We first compared the two cohorts using independent group t-test and  $\chi^2$  test for quantitative and categorical  
46 variables and found significant differences between the cohorts with respect to demographic and clinical  
47 measures. Members of the delirium cohort were more likely than controls to be older (mean age: 79 vs. 77), more  
48 likely to have a lower level of illness and severity burden (mean CCI: 4 vs. 6),<sup>13</sup> and more likely to have a primary  
49 diagnosis of mental/neurological clinical classification. The cohorts did not differ with respect to gender or  
50 ethnicity as both cohort's members were more likely to be Caucasian females (See Table 1).  
51  
52

53 Time 0 was defined as date of index encounter and days between death date and index encounter was calculated  
54 for the model. In addition, beneficiaries were censored at the end of the 12-month follow-up period if death did  
55 not occur or loss of follow-up, whichever occurred earlier. We then used the exponential model for the survival  
56  
57  
58  
59  
60

time distribution to estimate yearly mortality rates for the delirium and control cohort using an unadjusted Kaplan-Meier survival curve. In addition, a score test (univariate Cox proportional hazards model) was utilized as a comparison to the unadjusted Kaplan-Meier survival curves.<sup>14</sup>

**Table 1: Cohort Characteristics**

| Characteristics                            | Delirium      | Control<br>(No Delirium) |
|--------------------------------------------|---------------|--------------------------|
| <b>Total</b>                               | 26,245 (100)  | 262,450 (100)            |
| <b>Age</b>                                 | ...           | ...                      |
| 65-74                                      | 8,723 (33.2)  | 106,163 (40.4)           |
| 75-84                                      | 9,500 (36.2)  | 96,998 (37.0)            |
| ≥85                                        | 8,022 (30.6)  | 59,272 (22.6)            |
| <b>Mean Age</b>                            | 79            | 77                       |
| <b>Gender</b>                              | ...           | ...                      |
| Female                                     | 16,279 (62.1) | 160,421 (61.1)           |
| Male                                       | 9,966 (37.9)  | 102,012 (38.8)           |
| <b>Race</b>                                | ...           | ...                      |
| Caucasian                                  | 22,699 (86.5) | 222,177 (84.7)           |
| African American                           | 2,243 (8.5)   | 27,328 (10.4)            |
| Asian                                      | 345 (1.3)     | 3,115 (1.2)              |
| Hispanic                                   | 473 (1.8)     | 4,683 (1.8)              |
| Native American                            | 134 (0.51)    | 1,389 (0.53)             |
| Other/Unknown                              | 281 (1.1)     | 2,852 (1.1)              |
| <b>Charlson Comorbidity Scores</b>         | ...           | ...                      |
| None (0)                                   | 12,423 (47.3) | 113,743 (43.3)           |
| Low (1-4)                                  | 13,182 (50.2) | 141,832 (54.0)           |
| Moderate (5-9)                             | 595 (2.3)     | 6,553 (2.5)              |
| High (10+)                                 | 45 (0.17)     | 305 (0.12)               |
| <b>Mean CCI Score</b>                      | 4             | 6                        |
| <b>Primary Diagnosis<br/>(ICD-9 Codes)</b> | ...           | ...                      |
| Infectious Diseases (0-139)                | 252 (1.0)     | 2,235 (0.9)              |
| Neoplasms (140-239)                        | 93 (0.4)      | 926 (0.4)                |
| Mental/Neurological<br>(240-289)           | 4,651 (17.7)  | 8,547 (3.3)              |
| Cardiovascular (390-429)                   | 1,396 (5.3)   | 17,038 (6.5)             |
| Cerebrovascular (430-459)                  | 1,117 (4.3)   | 7,814 (3.0)              |
| Respiratory (460-519)                      | 794 (3.0)     | 15,802 (6.0)             |
| Digestive (460-519)                        | 312 (1.2)     | 13,927 (5.3)             |
| Urogenital (580-629)                       | 1,552 (5.9)   | 14,509 (5.5)             |
| Musculoskeletal (710-739)                  | 412 (1.6)     | 19,779 (7.5)             |
| Symptoms (782-789)                         | 1,803 (6.9)   | 60,126 (22.9)            |
| Injuries (790-799)                         | 151 (0.6)     | 1,593 (0.6)              |
| Ill-defined, Skin, or Missing<br>(680-709) | 58 (0.2)      | 5,299 (2.0)              |
| Endocrine (240-289)                        | 1,463 (5.6)   | 10,788 (4.1)             |
| <b>Mortality</b>                           |               |                          |
| 30 Days                                    | 3,129 (11.9)  | 7,649 (2.9)              |
| 90 Days                                    | 4,251 (16.2)  | 15,267 (5.8)             |
| 6 Months                                   | 5,364 (20.4)  | 24,453 (9.3)             |
| 12 Months                                  | 7,104 (27.1)  | 39,404 (15.0)            |



1  
2  
3  
4  
5  
6  
7 Additionally, to adjust for possible prognostic factors of delirium on mortality, we used a multivariable Cox  
8 proportional hazards model with the following covariates: age, gender, dementia, and comorbidity (as defined by  
9 CCI). To address the potential interaction of delirium on mortality based on these characteristics, we evaluated all  
10 covariates in the multivariable Cox model, and then selected statistically significant interactions for further testing.  
11 In addition, to confirm results we re-ran these analyses using multiple randomly selected samples from within the  
12 control group and found no statistically significant differences.  
13

## 14 RESULTS

15  
16 During the 12-month study period 288,695 claims were included in our analysis sample, of which 26,245 comprised  
17 the delirium cohort and 262,450 control claims. Beneficiaries were largely similar with respect to gender, and  
18 primary diagnosis distributions, however when evaluating comorbidity scores, beneficiaries had higher scores in  
19 the control group suggesting higher risk of mortality (see Table 1). Among all beneficiaries, 46,508 (16.1%) died  
20 within 12 months. Of which 39,404 (15.0%) were in the non-delirium (i.e., control group) and 7,104 (27.1%) were  
21 in the delirium cohort respectively. In the delirium cohort, Kaplan-Meier survival decreased rapidly during the first  
22 30 days after the index visit and thereafter continued to decline at a slower pace in comparison to the control  
23 group. At 30 days after index visit, the survival rate for beneficiaries with delirium was 88.2%, while the control  
24 group had a survival rate of 97.6%.  
25  
26

27  
28 Results from the univariate and multivariate Cox proportional hazard models for 30 days, 90 days, 6 months, and  
29 12 months are reported in Table 2. Our unadjusted results for delirium and mortality was strongest at 30 days as  
30 illustrated in the Kaplan-Meier survival curve (HR, 4.35; 95% CI, 4.17-4.54) (see Figure 2). Even after adjusting for  
31 covariates, delirium was still independently associated with approximately a five-fold increase in mortality during  
32 the 30-day follow-up period (HR 4.82; 95% CI, 4.60-5.04). Over time from index ED encounter, delirium was still c  
33 associated with an increased risk of mortality compared to the control group. However, mortality risk (while still  
34 significant) did decrease over time up until 12 months (HR 2.07; 95%, 2.01-2.13).  
35  
36  
37  
38  
39  
40  
41  
42  
43  
44  
45  
46  
47  
48  
49  
50  
51  
52  
53  
54  
55  
56  
57  
58  
59  
60

Table 2: Cox Proportional Hazard Ratios in Intervals to 12-Month Mortality

| Mortality Rate   | Variable          | Univariate         | Multivariate       |
|------------------|-------------------|--------------------|--------------------|
| <b>30 Days</b>   | Delirium/Control  | 4.35† (4.17-4.54)  | 4.82 † (4.60-5.04) |
| ...              | Age               | 1.06† (1.05-1.06)  | 1.06 † (1.05-1.06) |
| ...              | Male/Female       | 0.72 † (0.69-0.74) | 0.70 † (0.67-0.73) |
| ...              | CCI               | 1.29† (0.77-1.28)  | 1.30 † (1.29-1.31) |
| ...              | Dementia          | 1.84† (1.75-1.94)  | 1.44 † (1.35-1.53) |
| ...              | Delirium*Dementia | ...                | 0.41 † (0.36-0.45) |
| <b>90 Days</b>   | Delirium/Control  | 3.02 † (2.14-2.30) | 3.27 † (3.15-3.40) |
| ...              | Age               | 1.06 † (1.05-1.06) | 1.06 † (1.05-1.06) |
| ...              | Male/Female       | 0.74 † (0.72-0.76) | 0.72 † (0.70-0.75) |
| ...              | CCI               | 1.32 † (1.31-1.32) | 1.32 † (1.31-1.33) |
| ...              | Dementia          | 2.12 † (2.04-2.20) | 1.58 † (1.51-1.65) |
| ...              | Delirium*Dementia | ...                | 0.48 † (0.44-0.52) |
| <b>6 months</b>  | Delirium/Control  | 2.42 † (2.35-2.49) | 2.55 † (2.47-2.64) |
| ...              | Age               | 1.06 † (1.05-1.06) | 1.06 † (1.05-1.06) |
| ...              | Male/Female       | 0.76 † (0.74-0.78) | 0.73 † (0.71-0.75) |
| ...              | CCI               | 1.31 † (1.30-1.31) | 1.31 † (1.31-1.32) |
| ...              | Dementia          | 2.25 † (2.18-2.31) | 1.64 † (1.58-1.70) |
| ...              | Delirium*Dementia | ...                | 0.53 † (0.49-0.57) |
| <b>12 months</b> | Delirium/Control  | 2.02 † (1.96-2.07) | 2.07 † (2.01-2.13) |
| ...              | Age               | 1.06 (1.05-1.06)   | 1.06 † (1.05-1.06) |
| ...              | Male/Female       | 0.76 † (0.75-0.78) | 0.73 † (0.71-0.74) |
| ...              | CCI               | 1.30 † (1.29-1.31) | 1.30 † (1.29-1.31) |
| ...              | Dementia          | 2.28 ‡ (2.23-2.34) | 1.62 † (1.57-1.66) |
| ...              | Delirium*Dementia | ...                | 0.60 † (0.56-0.64) |

Data are hazard ratios for univariate & multivariate for time periods to 1-year mortality rate (95% confidence interval). Of 277,951 patients, 46,508 died (16.7%) in both groups. Of which 39,404 (15.0%) were in the control group (no delirium) & 7,104 (27.1%) were in the delirium cohort, respectively.  
 Note(s): †P-value < 0.001; \* indicates interaction

Other covariates that affected mortality rate included older age and higher comorbidity scores. However, women with delirium had a decreased risk of mortality, compared to males with delirium (HR 0.73; 95% CI, 0.71-0.74) at 12 months (see Table 2).

The presence of dementia, on the other hand, had a stronger association in the univariate model, however our adjusted multivariate model indicated dementia was not a significant predictor of mortality and instead associated with a significant protective effect on mortality. This protective effect is demonstrated by the significant statistical interaction between delirium and dementia ( $P \geq 0.001$ ) while adjusting for covariates (HR 0.60; 95% CI, 0.56-0.64).

## DISCUSSION

Our study found that delirium is an independent predictor of mortality among ED patients diagnosed with delirium in the ED compared to ED patients without delirium, even after adjusting for confounding factors such as age, gender, comorbidity, and dementia. While delirium had a strong effect on mortality during the entire 12-month follow-up period, the strongest association was at 30 days following index ED visit.

Generally, our findings are consistent with prior research examining delirium and mortality risk. For example, Lewis et al. observed that patients with delirium discharged from the ED had a significantly higher mortality risk at 3 months compared to a comparable control group (14% versus 8%), and we found similar unadjusted results at 3 months (16% versus 6%). Similarly, our findings report a two-fold mortality risk for delirium patients at 12 months following an ED visit (HR 2.07; 95%, 2.01-2.13) in line with McCusker et al (HR 2.11; 95%, 1.18-3.77), after adjusting for covariates. However, our results indicate a higher risk of mortality compared to prior research at 6 months, as Han et al. found seniors to be 1.7 times more likely to be at risk for mortality (HR 1.72; 95% CI, 1.04-2.86), compared to our study which found the risk to be over 2.5 times more likely at 6 months (HR 2.55, 95% CI, 2.47-2.64). In addition, our findings are also consistent with prior research on delirium as an independent indicator for mortality in the inpatient setting.<sup>3</sup> For instance, past studies report a two-fold increase in mortality risk among delirium patients, and our results point to a similar two-fold increase in mortality during 12-month follow-up.

Our findings are also in line with prior research highlighting the role of dementia superimposed on delirium and its protective effect on mortality.<sup>3</sup> Others have theorized as to why this is the case, however further research is needed in distinguishing acute behavioral changes of delirium with the longer-term changes associated with dementia to properly evaluate its impact. One reason may be that delirium may be harder to distinguish in patients with dementia, leading to misclassification in claims data. Further research is needed in distinguishing acute behavioral changes of delirium with the longer-term changes associated with dementia and the proper screening and measurements.

Given the clinical as well as cost implications, our results call for an increase in screening and management of delirium in the ED. A practical first step is through implementation of a validated delirium screening tool into the ED clinical workflow. Since the majority of patients with delirium have a clinically subtle presentation, it is often missed by providers, which is likely to be the case in a busy ED. While multiple resources exist for delirium screening, the most widely used in the inpatient setting is the Confusion Assessment Method (CAM). The brief CAM (b-CAM) is a modified and validated screening tool for delirium and is one of, if not the only instrument validated for use in the ED setting.<sup>15 16</sup> The b-CAM takes less than 2 minutes to perform, is highly reliable, easy to use, and requires minimal training, all of which make it an ideal instrument for an ED.<sup>17</sup> While other validated screening instruments are available such as the Delirium Rating Scale, the Nurses Delirium Screening Checklist, or the 4As test, many of these tools were not designed for use in the ED and either require specialized training or more time to complete than is often available in an ED encounter.<sup>18</sup>

A growing number of EDs specializing in geriatric care (i.e., Geriatric Emergency Departments) are already incorporating delirium protocols and screening instruments into their ED workflow. In fact, the Geriatric Emergency Department Guidelines, endorsed by leading professional societies in Emergency Medicine, Nursing and Geriatrics, identify delirium screening, and specifically the b-CAM as a recommended screening instrument for use in the ED's. The Society for Academic Emergency Medicine has even recommended delirium screening as a key quality indicator for geriatric emergency care underscoring the importance of detection and management of delirium in the ED.<sup>2 15</sup>

1  
2  
3 While screening for delirium is an important first step, screening alone is insufficient and must be followed by  
4 clinical intervention to be effective. Based on screening results, decreased use of psychoactive medication or other  
5 non-pharmacologic approaches such as increased mobilization (i.e., reduced of physical restraints, bladder  
6 catheters), and re-orienting the patient through cognitive stimulation are examples of interventions used in the  
7 inpatient setting that may also be appropriate for the ED.<sup>7</sup> While it remains unclear whether instruments such as  
8 the b-CAM or follow-up interventions used in the inpatient setting are associated with reduced mortality risk in the  
9 ED, incorporating a delirium instrument into ED workflows represents an important first step to more reliably  
10 detect delirium in the ED. Future research will then need to address the most effective screening and treatment  
11 protocols.  
12  
13

## 14 Limitations

15  
16 Our study utilized national claims-level data, which poses several limitations. The date of claims submission does  
17 not necessarily reflect date of service however these differences are often considered marginal. Additionally,  
18 claims data lack information on severity and duration of illness prior to the diagnosed event. While we attempted  
19 to address this issue by including a three-month control period prior to qualifying index encounters and focusing  
20 on outpatient claims only, this still did not address the severity of delirium, which is likely to impact mortality risk.  
21  
22

23 Furthermore, we identified 26,245 (0.35%) patients  $\geq 65$  with delirium which is lower compared to rates of  
24 delirium in the ED widely reported in literature, which ranges anywhere from 3.6-35% with a mean of 17.5%.<sup>4 5 9</sup>  
25 Our lower incidence of delirium based on available claims may reflect a failure to diagnose, failure to code, or a  
26 lower rate of delirium patients in ED's. This potential absence of delirium diagnoses from a national claims  
27 database may limit the generalizability of our findings in helping capture the true impact of delirium on mortality.  
28  
29

## 30 CONCLUSIONS

31  
32 Our study of national claims-level data demonstrates that delirium is a significant marker of mortality among  
33 seniors visiting the ED, and that mortality risk is most prominent in the first three months following an ED visit.  
34 Given the significant clinical as well as financial implications associated with seniors discharged from the ED with  
35 delirium, there is a need to increase delirium screening and management within the ED to help identify and treat  
36 underlying conditions. Specifically, future research is needed to focus on implementation and dissemination of  
37 existing delirium protocols (i.e., screening and follow-up interventions) for the ED and whether doing so helps  
38 reduce mortality risk in seniors discharged from the ED with this fatal and potentially avoidable condition.  
39  
40

## 41 FOOTNOTES

### 42 Figure Legends

43  
44  
45  
46  
47  
48 **Figure 1. Flowchart for inclusion/exclusion criteria**

49 **Figure 2. Kaplan-Meier Survival Curves**

50 Assessing changes over time in the unadjusted effect of delirium on mortality in comparison to the control group (no delirium).  
51 The dotted line represents patients with delirium and when compared to the control group the survival rate decreased rapidly  
52 during the first 30 days after the index visit and continued to decline slowly.  
53  
54  
55  
56  
57  
58  
59  
60

1  
2  
3 **Contributors Statement:** JI, TK, AL, and KK contributed to study design. JI and TK performed the data analysis. JI  
4 led drafting of the manuscript, with additional manuscript writing performed by AL and KK All authors had full  
5 access to all the data including statistical reports and tables in the study and can take full responsibility for the  
6 integrity of the data and the accuracy of the data analysis.  
7

8 **Funding:** This project received no specific funding.  
9

10 **Competing Interests:** All authors declare no financial relationships with any organizations that might have an  
11 interest in the submitted work or other relationships or activities that could appear to have influenced the  
12 submitted work.  
13

14 **Data Sharing Statement:** No additional data available  
15

16  
17 **Transparency:** The lead author affirms that the manuscript is an honest, accurate and transparent account of the  
18 study analyzed and reported; that no important aspects of the study have been omitted; and that any  
19 discrepancies from the study as planned have been explained.  
20

21 **Copyright Statement:** The Corresponding Author has the right to grant on behalf of all authors and does grant  
22 on behalf of all authors, a worldwide license to the Publishers and its licensees in perpetuity, in all forms, formats  
23 and media (whether known now or created in the future), to i) publish, reproduce, distribute, display and store the  
24 Contribution, ii) translate the Contribution into other languages, create adaptations, reprints, include within  
25 collections and create summaries, extracts and/or, abstracts of the Contribution, iii) create any other derivative  
26 work(s) based on the Contribution, iv) to exploit all subsidiary rights in the Contribution, v) the inclusion of  
27 electronic links from the Contribution to third party material where-ever it may be located; and, vi) license any  
28 third party to do any or all of the above.  
29  
30  
31  
32  
33  
34  
35  
36  
37  
38  
39  
40  
41  
42  
43  
44  
45  
46  
47  
48  
49  
50  
51  
52  
53  
54  
55  
56  
57  
58  
59  
60

## REFERENCES

1. Albert M, McCaig L, Ashman J. Emergency Department Visits by Persons Aged 65 and Over: United States. NCHS Data Brief 2013 (130).
2. Fong T, Tulebaev S, Inouye S. Delirium in Elderly Adults: Diagnosis, Prevention, and Treatment Nature Reviews Neurology 2009;**5**:210-20.
3. Ritsuko Kakuma GGDF, Louise Arsenault, Anne Perrault, Robert W. Platt, Johanne Monette, Yola Moride, & Christina Wolfson Delirium in Older Emergency Department Patients Discharged Home: Effect on Survival Journal of the American Geriatrics Society 2003;**51**(4):443-50.
4. Inouye S, Westendorp R, Sacynski J. Delirium in Elderly People Lancet 2015 **383**(9920):911-22.
5. Jane McCusker MC, Michal Abrahamowicz, Francois Primeau, & Eric Belzile Delirium Predicts 12- Month Mortality JAMA Internal Medicine 2002 **162**(4):457-63.
6. Gower L, Gatewood M, Kang C. Emergency Department Management of Delirium in the Elderly Western Journal of Emergency Medicine 2012 **2**(13):194-201.
7. Han J, Wilson A, Ely W. Delirium in the Older Emergency Department Patient - A Quiet Epidemic Emergency Medicine Clinics of North America 2010 **3**(28):611-31.
8. Han J, Zimmerman E, Cutler N, et al. Delirium in Older Emergency Department Patients: Recognition, Risk Factors, and Psychomotor Subtypes Journal of the Society for Academic Emergency Medicine 2009 **16**:193-200.
9. Han J, Shintani A, Eden S, et al. Delirium in the Emergency Department: an Independent Predictor of Death Within Six Months. Annals of Emergency Medicine 2010 **3**(56):244-52.
10. Tyree P, Lind B, Lafferty W. Challenges and Advantages of Using Medicare Claims Data for Utilization Analysis The American Journal of Medicine 2006 **4**(21):269-75.
11. Wolfe, R. (1991). "Survival Analysis Methods for the End Stage Renal Disease Program in Medicare " Kidney Failure & the Federal Government: 353-375.
12. Ogundimu E, Altman D, Collins G. Adequate Sample Size for Developing Prediction Models is Not Simply Related to Events per Variable Journal of Clinical Epidemiology 2016 175-82.
13. Charlson M, Pompei K, Ales K, et al. A New Method of Classifying Prognostic Comorbidity in Longitudinal Studies: Development & Validation Journal Of Chronic Diseases 1987;**40**(5):373-83.
14. Smith B, Smith T. Kaplan Meier & Cox Proportional Hazards Modeling: Hands-On Survival Analysis Department of Defense Center for Deployment Health Research 2014.
15. De J, Wand A. Delirium Screening: A Systematic Review of Delirium Screening Tools The Gerontologist 2015 **55**(6):1079-99.
16. Wei L, Fearing M, Sternberg E, et al. The Confusion Assessment Method (CAM): A Systematic Review of Current Usage Journal of American Geriatrics Society 2008 **56**(5):823-30.
17. Mariz J, Castanho T, Teixeira J, et al. Delirium Diagnostic and Screening Instruments in the ED: An Up-to-Date Systematic Review Journal of American Geriatrics Society 2016
18. Grover S, Kate N. Assesment Scales of Delirium World Journal of Psychiatry 2012 **2**(4):58-70.

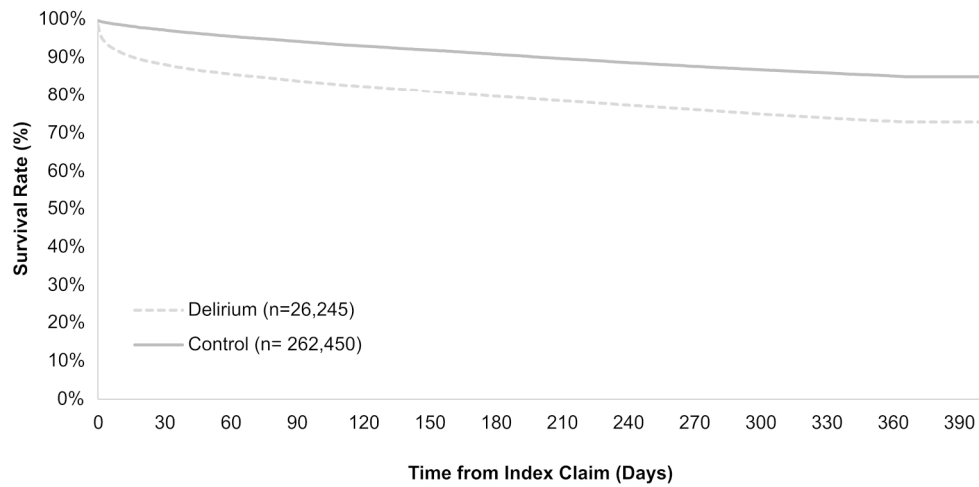

Figure 2: Kaplan- Meier Survival Curves

Assessing changes over time in the unadjusted effect of delirium on mortality in comparison to the control group (no delirium). The dotted line represents patients with delirium and when compared to the control group the survival rate decreased rapidly during the first 30 days after the index visit and continued to decline slowly.

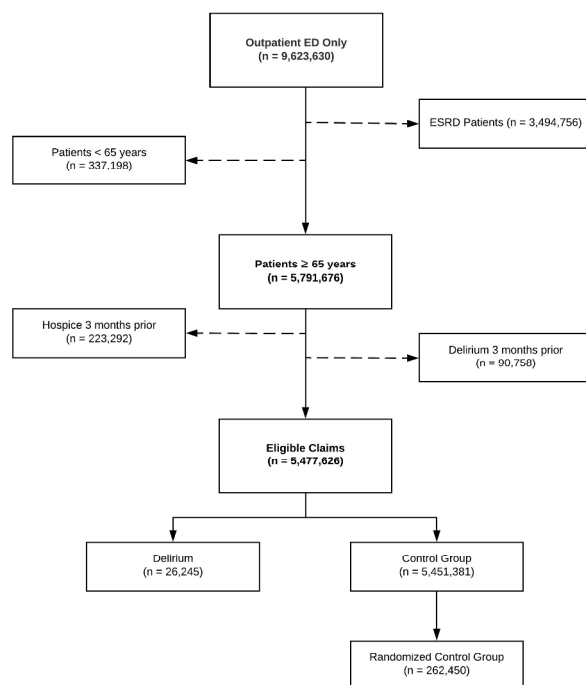

Figure 1: Inclusion/Exclusion Flowchart

280x217mm (300 x 300 DPI)



## Supplemental File

### Appendix 1. Diagnosis Related Group (DRG) codes for Delirium with ICD-9

| ICD-9 Code     | Description                                                 | Number of Claims |
|----------------|-------------------------------------------------------------|------------------|
| 293.0          | Acute Delirium (also documented as acute confusional state) | 3,056            |
| 290.41 & 437.0 | Arteriosclerotic Dementia with Delirium                     | 538              |
| 293.89         | Chronic Delirium                                            | 18               |
| 780.09         | Delirium, not otherwise specified                           | 17,226           |
| 293.81         | Drug Induced Delirium                                       | 46               |
| 300.11         | Hysterical Delirium                                         | 239              |
| 290.11         | Presenile Dementia with Delirium                            | 1,714            |
| 290.3          | Senile Dementia with Delirium                               | 576              |
| 293.1          | Subacute Delirium                                           | 108              |
| 308            | Exhaustion Delirium                                         | 978              |
| 584-586        | Uremic Delirium                                             | 1,746            |
