# Supplementary material for: Delirium as a predictor of mortality in US Medicare beneficiaries discharged from the emergency department: a national claims-level analysis up to 12 months
Source: PubMed Central journal article supplement — BMJ Open. 2018 May 5;8(5):e021258. doi: 10.1136/bmjopen-2017-021258 (PMC5942463; doi:10.1136/bmjopen-2017-021258), 2018-05-05
Supplement: bmjopen-2017-021258supp001.pdf [file bmjopen-2017-021258supp001.pdf]

## Supplemental File

### Appendix 1. Diagnosis Related Group (DRG) codes for Delirium with ICD-9

| ICD-9 Code     | Description                                                 | Number of Claims |
|----------------|-------------------------------------------------------------|------------------|
| 293.0          | Acute Delirium (also documented as acute confusional state) | 3,056            |
| 290.41 & 437.0 | Arteriosclerotic Dementia with Delirium                     | 538              |
| 293.89         | Chronic Delirium                                            | 18               |
| 780.09         | Delirium, not otherwise specified                           | 17,226           |
| 293.81         | Drug Induced Delirium                                       | 46               |
| 300.11         | Hysterical Delirium                                         | 239              |
| 290.11         | Presenile Dementia with Delirium                            | 1,714            |
| 290.3          | Senile Dementia with Delirium                               | 576              |
| 293.1          | Subacute Delirium                                           | 108              |
| 308            | Exhaustion Delirium                                         | 978              |
| 584-586        | Uremic Delirium                                             | 1,746            |
